# Supplementary material for: Honey polyphenols: regulators of human microbiota and health
Source: Royal Society of Chemistry journal article supplement (doi:10.1039/d2fo02715a), 2022-12-06
Supplement: d2fo02715a1.pdf [file d2fo02715a1.pdf]

SUPPLEMENTARY DATA

Table S1 –Polyphenol occurrence in selected honeys with different botanical origins.

| Polyphenol Name            | Honey Kinds |        |     |     |     |     |        |      |      |
|----------------------------|-------------|--------|-----|-----|-----|-----|--------|------|------|
|                            | LH          | BH     | HH  | TCH | PVH | DDH | MAH    | STH  | MH   |
| Reference                  | [1, 2]      | [3, 4] | [4] | [5] | [6] | [7] | [8, 9] | [10] | [11] |
| 3,4-dimethoxycinnamic acid |             |        |     |     |     | X   |        |      |      |
| 3,5-dihydroxybenzoic acid  |             |        |     |     |     | X   |        |      |      |
| 3-O-acetyl pinobanksin     |             |        |     | X   |     |     |        |      |      |
| 3-hydroxybenzoic acid      |             | X      | X   |     |     |     |        |      |      |
| 4-Hydroxybenzaldehyde      |             | X      |     |     |     |     |        |      |      |
| 4-Hydroxybenzoic acid      |             | X      | X   | X   |     | X   | X      |      | X    |
| 4-hydroxyphenylacetic acid |             |        |     |     |     |     |        |      | X    |
| 8-methoxykaempferol        |             |        |     |     |     |     | X      |      |      |
| Apigenin                   | X           |        |     | X   | X   |     |        | X    | X    |
| Benzoic acid               |             | X      |     |     |     |     |        |      | X    |
| Biochanin A                |             |        |     | X   |     |     |        |      |      |
| Caffeic acid               | X           |        | X   | X   | X   | X   | X      |      | X    |
| Carvacrol                  |             |        |     |     |     |     |        |      | X    |
| Chorogenic acid            |             | X      | X   | X   | X   | X   |        |      | X    |
| Chrysin                    | X           | X      | X   |     | X   |     |        |      | X    |
| Cinnamic acid              | X           |        |     |     |     | X   |        | X    | X    |
| Cis,trans-abscisic acid    | X           | X      | X   | X   |     | X   |        |      |      |
| Dihydrokaempferol          |             |        |     | X   |     |     |        |      |      |
| Ellagic acid               |             | X      | X   | X   |     | X   |        |      |      |
| Epicatechin                |             |        |     | X   |     |     |        |      |      |
| Ferulic acid               |             | X      | X   |     | X   | X   |        |      | X    |
| Fisetin                    |             |        |     | X   |     | X   |        |      |      |
| Galangin                   | X           | X      | X   |     | X   |     |        | X    | X    |
| Gallic acid                | X           | X      |     | X   |     | X   | X      |      | X    |
| Genistein-7-O-glucoside    |             |        |     | X   |     |     |        |      |      |
| Hesperetin                 |             |        |     |     |     | X   |        |      |      |
| Hesperidin                 |             |        |     |     |     | X   |        |      |      |
| Isoferulic Acid            |             | X      |     |     |     |     | X      |      |      |
| Isorhamnetin-3-O-glucoside |             |        |     |     |     |     |        |      |      |
| Kaempferol                 | X           | X      | X   | X   |     |     | X      | X    | X    |
| Lindenin                   | X           |        |     |     |     |     |        |      |      |
| Luteolin                   | X           |        |     | X   |     | X   | X      | X    | X    |
| Luteolin-5-methyl ether    |             |        |     | X   |     |     |        |      |      |
| Maleic acid                |             |        |     |     |     |     |        |      | X    |
| Methyl syringate           | X           | X      |     | X   |     |     |        |      |      |
| Myricetin                  |             | X      | X   |     |     |     |        |      | X    |
| Naringenin                 |             |        |     | X   | X   | X   |        |      | X    |

|                            |   |   |   |   |   |   |   |   |   |
|----------------------------|---|---|---|---|---|---|---|---|---|
| Naringin                   |   |   |   |   |   | X |   |   | X |
| o-coumaric acid            |   |   |   |   |   | X |   |   |   |
| p-coumaric acid            | X | X | X |   | X |   | X |   | X |
| Phenethyl caffeate         |   |   |   | X |   |   |   |   |   |
| Phenol                     |   |   |   |   |   |   |   |   | X |
| Pinobanksin                | X |   |   |   | X |   |   | X |   |
| Pinobanksin-5-methyl ether |   |   |   | X |   |   |   |   |   |
| Pinocembrin                | X |   |   |   |   | X |   | X |   |
| Protocatechuic acid        | X | X |   | X | X | X |   |   |   |
| Quercetin                  |   | X | X | X | X | X | X |   | X |
| Rosmarinic acid            |   | X | X |   | X |   |   |   |   |
| Rutin                      |   |   |   | X |   | X |   | X |   |
| Salicylic acid             |   |   |   | X |   |   |   |   |   |
| Sinapic acid               |   |   |   |   |   |   |   |   | X |
| Syringic acid              |   |   | X |   | X | X | X | X | X |
| Thymol                     |   |   |   |   |   |   |   |   | X |
| Trans-abscisic acid        | X | X |   |   |   |   |   |   |   |
| Vanillic acid              |   | X | X |   | X |   |   |   | X |
| Vanillin                   |   | X |   |   |   |   |   |   |   |

LH: Linden Honey. BH: Buckwheat honey. HH: Heather honey. TCH: *Triadica cochinchinensis* honey. PVH: *Prunella vulgaris* honey. DDH: *Dendropanax dentiger* honey. MAH: Manuka honey. STH: strawberry tree honey. MH: Multifloral honey.

**Table S2 – Flavonoids and Non-Flavonoids total content in selected honey with different botanical origins.**

| Honey Botanical Origin | Flavonoids Content (mg CAE/kg) | Non-Flavonoids Content (mg GAE/kg) | Reference |
|------------------------|--------------------------------|------------------------------------|-----------|
| LH                     | 61.2                           | 0.1331                             | [1, 2]    |
| BH                     | 96.6                           | 0.211                              | [3, 4]    |
| HH                     | 77.5                           | 0.306                              | [4]       |
| PVH                    | 145.7                          | N/D                                | [6]       |
| MAH                    | 71.9                           | 0.89                               | [8, 9]    |
| STH                    | 80.55                          | 0.82                               | [10]      |
| MH                     | 56.8                           | 0.141                              | [11]      |

Flavonoids content as a chlorogenic acid equivalents (mg CAE/kg). There are no references available about TCH and DDH flavonoid content. Non-Flavonoids total content as gallic acid equivalents (mg GAE/kg). There are no references available about PVH and DDH non-flavonoid total content. LH: Linden Honey. BH: Buckwheat honey. HH: Heather honey. PVH: *Prunella vulgaris* honey. MAH: Manuka honey. STH: strawberry tree honey. MH: Multifloral honey. N/D: No determined.

**Table S3 – Dominant Species Composition in each phylum level group of the mouse intestinal microbiota[5].**

| Dominant Species Composition (%) | Species Phylum    | Groups of Mice |       |       |       |       |       |       |
|----------------------------------|-------------------|----------------|-------|-------|-------|-------|-------|-------|
|                                  |                   | G1             | G2    | G3    | G4    | G5    | G6    | G7    |
|                                  | Bacteroidetes     | 69.34          | 48.62 | 64.31 | 54.96 | 48.71 | 42.75 | 48.55 |
|                                  | Firmicutes        | 23.54          | 39.78 | 26.45 | 31.49 | 37.49 | 44.85 | 35.94 |
|                                  | Campilobacterota  | 2.07           | 1.98  | 3.01  | 9.1   | 8.1   | 3.28  | 8.6   |
|                                  | Actinobacteriota  | 2.19           | 4.18  | 2.5   | 0.29  | 1.89  | 3.47  | 1.51  |
|                                  | Verrucomicrobiota | 1.49           | 2.86  | 2.45  | 2.59  | 0.77  | 1.57  | 3.31  |
|                                  | Proteobacteria    | 0.33           | 1.3   | 0.3   | 0.57  | 1.85  | 3.31  | 0.64  |
|                                  | Desulfobacterota  | 0.7            | 0.79  | 0.75  | 0.63  | 0.73  | 0.36  | 1.12  |

**Table S4 – Activity disease index in colitic mice supplemented with DSS and PVH[6].**

| Experimental Days | Activity Disease Index |         |
|-------------------|------------------------|---------|
|                   | DSS                    | PVH     |
| 0                 | 0                      | 0       |
| 1                 | 0.36259                | 0.03541 |
| 2                 | 1.63165                | 0.84604 |
| 3                 | 2.51223                | 0.73381 |
| 4                 | 4.11799                | 0.74245 |
| 5                 | 5.14532                | 2.09784 |
| 6                 | 3.62590                | 1.37266 |
| 7                 | 3.38417                | 1.60576 |

## References

- [1] J. Qiao, L. Chen, L. Kong, J. Dong, Z. Zhou, H. Zhang, Characteristic Components and Authenticity Evaluation of Rape, Acacia, and Linden Honey, *Journal of Agricultural and Food Chemistry* 68(36) (2020) 9776-9788.
- [2] S. Kečkeš, U. Gašić, T.Ć. Veličković, D. Milojković-Opsenica, M. Natić, Ž. Tešić, The determination of phenolic profiles of Serbian unifloral honeys using ultra-high-performance liquid chromatography/high resolution accurate mass spectrometry, *Food Chemistry* 138(1) (2013) 32-40.
- [3] L. Jiang, M. Xie, G. Chen, J. Qiao, H. Zhang, X. Zeng, Phenolics and Carbohydrates in Buckwheat Honey Regulate the Human Intestinal Microbiota, *Evid Based Complement Alternat Med* 2020 (2020) 6432942-6432942.
- [4] I. Jasicka-Misiak, A. Poliwoda, M. Dereń, P. Kafarski, Phenolic compounds and abscisic acid as potential markers for the floral origin of two Polish unifloral honeys, *Food Chemistry* 131(4) (2012) 1149-1156.
- [5] L.P. Luo, J.P. Zhang, M.Y. Liu, S.R. Qiu, S.X. Yi, W.J. Yu, T. Liu, X.Y. Huang, F.J. Ning, Monofloral *Triadica Cochinchinensis* Honey Polyphenols Improve Alcohol-Induced Liver Disease by Regulating the Gut Microbiota of Mice, *Front. Immunol.* 12 (2021) 11.
- [6] K. Wang, Z. Wan, A. Ou, X. Liang, X. Guo, Z. Zhang, L. Wu, X. Xue, Monofloral honey from a medical plant, *Prunella Vulgaris*, protected against dextran sulfate sodium-induced ulcerative colitis via modulating gut microbial populations in rats, *Food Funct* 10(7) (2019) 3828-3838.
- [7] L. Wang, F. Ning, T. Liu, X. Huang, J. Zhang, Y. Liu, D. Wu, L. Luo, Physicochemical properties, chemical composition, and antioxidant activity of *Dendropanax dentiger* honey, *LWT* 147 (2021) 111693.
- [8] J.M. Alvarez-Suarez, M. Gasparrini, T.Y. Forbes-Hernández, L. Mazzoni, F. Giampieri, The Composition and Biological Activity of Honey: A Focus on Manuka Honey, *Foods* 3(3) (2014) 420-432.
- [9] S. Afrin, M. Gasparrini, T.Y. Forbes-Hernández, D. Cianciosi, P. Reboredo-Rodriguez, P.P. Manna, M. Battino, F. Giampieri, Protective effects of Manuka honey on LPS-treated RAW 264.7 macrophages. Part 1: Enhancement of cellular viability, regulation of cellular apoptosis and improvement of mitochondrial functionality, *Food and Chemical Toxicology* 121 (2018) 203-213.
- [10] G.L. Petretto, M. Cossu, M.C. Alamanni, Phenolic content, antioxidant and physico-chemical properties of Sardinian monofloral honeys, *International Journal of Food Science & Technology* 50(2) (2015) 482-491.
- [11] A.Y. Badjah Hadj Ahmed, S.M. Wabaidur, M.R. Siddiqui, Z.A. Alothman, M.S. Obeid, M.R. Khan, S.A. Al-Tamrah, Simultaneous determination of twenty-five polyphenols in multifloral and cactus honeys using solid-phase extraction and high-performance liquid chromatography with photodiode array detection, *European Food Research and Technology* 242(6) (2016) 943-952.
